# Supplementary material
Source: HighWire-hosted journal article supplement (https://erj.ersjournals.com/highwire/filestream/113400/field_highwire_adjunct_files/0/suppl_1_ambulatory_osas.pdf)
Supplement: suppl_1_ambulatory_osas.pdf [file suppl_1_ambulatory_osas.pdf]

# HOME FOLLOW UP PROTOCOL

**Call via telephone to make an appointment**  
(at one, three and six months of starting CPAP treatment)

**Visit patient at home**

- Check CPAP device
- Collect the memory card
- Administer the questionnaires
- Ask patient about compliance, clinical symptoms of OSAS and side effects of CPAP

Does the patient accept the CPAP treatment?

Partially no

Definitively no

Yes

Does the patient's referred compliance is less than 4 hours per night the 70% of nights?

Yes

No

Is Epworth  $\geq 12$ ?

Yes

No

Are clinical symptoms of OSAS still present?

Yes, without CV comorbidity

Yes, with CV comorbidity

No

Are there any side effects present?

Yes, mild

Yes, moderate to severe

No

Perform educational intervention:

- OSAS
- CPAP treatment

Pulmonologist reinforcement via telephone call

Pulmonologist reinforcement via scheduled visit to the hospital
